# Supplementary material for: Exploring social movement concepts and actions in a knowledge uptake and sustainability context: A concept analysis
Source: PubMed Central journal article supplement — Int J Nurs Sci. 2022 Sep 6;9(4):411–21. doi: 10.1016/j.ijnss.2022.08.003 (PMC9587399; doi:10.1016/j.ijnss.2022.08.003), 2022-09-06
Supplement: mmc1.pdf [file mmc1.pdf]

## **Exploring Social Movement Concepts and Actions in a Knowledge Uptake and Sustainability Context: A concept analysis**

### **Appendices – Supplementary files**

- **Supplementary File 1.** Table: List of databases (Indexed and grey literature)
- **Supplementary File 2.** Table: Manually searched health and social sciences journals and websites
- **Supplementary File 3.** Table: Medline search strategy
- **Supplementary File 4.** Table: Definitions of social movement
- **Supplementary File 5.** Table: Eligibility criteria
- **Supplementary File 6.** Figure: PRISMA diagram for the concept analysis

**Supplementary File 1. Table: List of databases (Indexed and grey literature)**

|                                  |                                                                                                                                                                                                                                                                                                                                                                  |
|----------------------------------|------------------------------------------------------------------------------------------------------------------------------------------------------------------------------------------------------------------------------------------------------------------------------------------------------------------------------------------------------------------|
| <b>Indexed journals</b>          | <ol style="list-style-type: none"><li>1. CINAHL</li><li>2. Cochrane Central</li><li>3. Cochrane Register of Controlled Trials</li><li>4. EMBASE</li><li>5. PsycINFO</li><li>6. MEDLINE</li><li>7. Scopus</li><li>8. ProQuest</li></ol>                                                                                                                           |
| <b>Grey literature databases</b> | <ol style="list-style-type: none"><li>1. Unpublished dissertations and theses:<ol style="list-style-type: none"><li>a. ProQuest</li></ol></li><li>2. For conference papers:<ol style="list-style-type: none"><li>a. Scopus</li><li>b. ProQuest Conference Papers Index</li></ol></li><li>3. Columbia International Affairs Online</li><li>4. Open Grey</li></ol> |

**Supplementary File 2. Table: Manually searched health and social sciences journals and websites**

|                                                                      |                                                                                                                                                                                                                                                                                                                                                                                                                                                                                                                                                                                                |
|----------------------------------------------------------------------|------------------------------------------------------------------------------------------------------------------------------------------------------------------------------------------------------------------------------------------------------------------------------------------------------------------------------------------------------------------------------------------------------------------------------------------------------------------------------------------------------------------------------------------------------------------------------------------------|
| <p><b>Manually searched peer-review journals</b></p>                 | <ol style="list-style-type: none"> <li>1. Implementation Science Journal</li> <li>2. Social Movement Studies Journal</li> </ol>                                                                                                                                                                                                                                                                                                                                                                                                                                                                |
| <p><b>Manually searched targeted websites on social movement</b></p> | <ol style="list-style-type: none"> <li>1. National Health System (NHS)</li> <li>2. Change.org</li> <li>3. Health Canada</li> <li>4. Registered Nurses' Association of Ontario</li> <li>5. Canada Patient Safety Institute (CPSI)</li> <li>6. Health Standards Organization (HSO)/Accreditation Canada</li> <li>7. Provincial patient safety organizations (for example, Health Quality Ontario, Health Quality Council of Alberta)</li> <li>8. Canadian Institute for Health Information</li> <li>9. Government of Canada Publications</li> <li>10. World Health Organization (WHO)</li> </ol> |

### Supplementary File 3. Table: MEDLINE search strategy

#### Research Question:

Aim: The aim of this concept analysis is to define social movement in the context of evidence uptake. This concept analysis will involve developing a clear definition of social movement by describing its attributes, antecedents, consequences, case examples and empirical measurements. Our research question is: What is the definition of social movement in the context of evidence uptake?

Database(s): **Ovid MEDLINE(R)** 1946 to June 04, 2019 Search Strategy:

| #  | Searches                                | Results |
|----|-----------------------------------------|---------|
| 1  | exp Social Change/                      | 22447   |
| 2  | Community Participation/                | 16404   |
| 3  | Politics/                               | 46928   |
| 4  | exp Political Activism/                 | 102     |
| 5  | exp Lobbying/                           | 4358    |
| 6  | exp Social Justice/                     | 11631   |
| 7  | (collectiv* adj3 action*).mp,kw.        | 1151    |
| 8  | (collectiv* adj3 behavio*).mp,kw.       | 1624    |
| 9  | (collective adj3 identit*).mp,kw.       | 213     |
| 10 | (collective* adj3 mobili?ation*).mp,kw. | 40      |
| 11 | (communit* adj3 action*).mp,kw.         | 1610    |
| 12 | (communit* adj3 involvement*).mp,kw.    | 2200    |
| 13 | (communit* adj3 particip*).mp,kw.       | 30143   |
| 14 | (grass-root* and movement*).mp,kw.      | 55      |
| 15 | (grassroot* and movement*).mp,kw.       | 122     |
| 16 | (group* adj3 action*).mp,kw.            | 1962    |
| 17 | (group* adj3 behavio*).mp,kw.           | 9737    |
| 18 | (group* adj3 identit*).mp,kw.           | 1111    |

|    |                                     |        |
|----|-------------------------------------|--------|
| 19 | lobby*.mp,kw.                       | 5541   |
| 20 | (social* adj3 chang*).mp,kw.        | 24355  |
| 21 | (social adj3 justice).mp,kw.        | 12665  |
| 22 | (social* adj3 development*).mp,kw.  | 9985   |
| 23 | (social* adj3 impact*).mp,kw.       | 6613   |
| 24 | (social* adj4 movement*).mp,kw.     | 1115   |
| 25 | (politi* adj3 activ*).mp,kw.        | 899    |
| 26 | solidarity.mp,kw.                   | 1938   |
| 27 | or/1-26                             | 152457 |
| 28 | exp Implementation Science/         | 117    |
| 29 | exp translational medical research/ | 9468   |
| 30 | exp "Diffusion of Innovation"/      | 18938  |
| 31 | exp Evidence-Based Practice/        | 84320  |
| 32 | (knowledge adj2 application).mp,kw. | 872    |
| 33 | (knowledge adj2 broke*).mp,kw.      | 181    |
| 34 | (knowledge adj2 diffus*).mp,kw.     | 174    |
| 35 | (knowledge adj2 disseminat*).mp,kw. | 895    |
| 36 | (knowledge adj2 exchang*).mp,kw.    | 769    |
| 37 | (knowledge adj2 implement*).mp,kw.  | 642    |
| 38 | (knowledge adj2 management*).mp,kw. | 2323   |
| 39 | (knowledge adj2 mobili*).mp,kw.     | 131    |
| 40 | (knowledge adj2 translat*).mp,kw.   | 3067   |
| 41 | (knowledge adj2 transfer*).mp,kw.   | 2041   |
| 42 | (knowledge adj2 uptak*).mp,kw.      | 173    |
| 43 | (knowledge adj2 utili*).mp,kw.      | 841    |
| 44 | (kt adj2 application*).mp,kw.       | 89     |
| 45 | (kt adj2 broke*).mp,kw.             | 0      |
| 46 | (kt adj2 diffus*).mp,kw.            | 7      |

|    |                                      |      |
|----|--------------------------------------|------|
| 47 | (kt adj2 disseminat*).mp,kw.         | 6    |
| 48 | (kt adj2 decision*).mp,kw.           | 2    |
| 49 | (kt adj2 exchang*).mp,kw.            | 6    |
| 50 | (kt adj2 implement*).mp,kw.          | 19   |
| 51 | (kt adj2 interven*).mp,kw.           | 82   |
| 52 | (kt adj2 mobil*).mp,kw.              | 1    |
| 53 | (kt adj2 plan*).mp,kw.               | 15   |
| 54 | (kt adj2 policy*).mp,kw.             | 4    |
| 55 | (kt adj2 policies*).mp,kw.           | 0    |
| 56 | (kt adj2 strateg*).mp,kw.            | 70   |
| 57 | (kt adj2 translat*).mp,kw.           | 263  |
| 58 | (kt adj2 transfer*).mp,kw.           | 24   |
| 59 | (kt adj2 uptake*).mp,kw.             | 24   |
| 60 | (kt adj2 utili*).mp,kw.              | 10   |
| 61 | (evidence* adj2 exchang*).mp,kw.     | 230  |
| 62 | (evidence* adj2 diffus*).mp,kw.      | 606  |
| 63 | (evidence* adj2 disseminat*).mp,kw.  | 1314 |
| 64 | (evidence* adj2 implement*).mp,kw.   | 3876 |
| 65 | (evidence* adj2 management*).mp,kw.  | 1937 |
| 66 | (evidence* adj2 mobil*).mp,kw.       | 285  |
| 67 | (evidence* adj2 transfer*).mp,kw.    | 605  |
| 68 | (evidence* adj2 translat*).mp,kw.    | 1527 |
| 69 | (evidence* adj2 uptake*).mp,kw.      | 542  |
| 70 | (evidence* adj2 util*).mp,kw.        | 865  |
| 71 | research findings into action.mp,kw. | 4    |
| 72 | research to action.mp,kw.            | 592  |
| 73 | research into action.mp,kw.          | 83   |
| 74 | evidence* to action.mp,kw.           | 554  |

|    |                                                 |         |
|----|-------------------------------------------------|---------|
| 75 | evidence* into action.mp,kw.                    | 33      |
| 76 | evidence* to practice.mp,kw.                    | 16429   |
| 77 | evidence* into practice.mp,kw.                  | 669     |
| 78 | (sustain* adj2 knowledge).mp,kw.                | 141     |
| 79 | (sustain* adj2 kt).mp,kw.                       | 5       |
| 80 | (sustain* adj2 evidence*).mp,kw.                | 646     |
| 81 | (sustain* adj2 innovation*).mp,kw.              | 165     |
| 82 | (sustain* adj2 model*).mp,kw.                   | 1011    |
| 83 | (sustain* adj2 frame*).mp,kw.                   | 229     |
| 84 | (sustain* adj2 change).mp,kw.                   | 1083    |
| 85 | (sustain* adj2 implement*).mp,kw.               | 1393    |
| 86 | (implementation adj2 science).mp,kw.            | 1224    |
| 87 | implementation science.jn.                      | 1202    |
| 88 | (diffus* adj2 innovat*).mp,kw.                  | 17454   |
| 89 | or/28-88                                        | 134867  |
| 90 | 27 and 89                                       | 3169    |
| 91 | (implement* and (social adj4 movement*)).mp,kw. | 86      |
| 92 | (knowledge* and (social adj4 movement*)).mp,kw. | 116     |
| 93 | (kt and (social adj4 movement*)).mp,kw.         | 0       |
| 94 | 90 or 91 or 92 or 93                            | 3337    |
| 95 | exp animals/ not (exp animals/ and exp humans/) | 4586077 |
| 96 | 94 not 95                                       | 3321    |
| 97 | limit 96 to yr="1990 -Current"                  | 3251    |
| 98 | limit 97 to english language                    | 3070    |

**Supplementary File 4. Table: Definitions of social movement**

| <b>First Author</b> | <b>Year</b> | <b>Definition</b>                                                                                                                                                                                                                     |
|---------------------|-------------|---------------------------------------------------------------------------------------------------------------------------------------------------------------------------------------------------------------------------------------|
| Koopmans [30]       | 1993        | “Social movements are characterized by a low degree of institutionalism, high heterogeneity, a lack of clearly defined boundaries and decision-making structures, a volatility matched by few other social phenomena.” (p.637).       |
| Elsy [16]           | 1998        | A voluntary banding of concerned people is characterized by the efforts of many committed individuals and groups. Social movements are motivated by strong interests and beliefs that are channeled into social and political action. |
| della Porta [31]    | 1999        | “Informal networks, based on shared beliefs and solidarity, which mobilise about conflictual issues, through the frequent use of various forms of protest.” (p.16)                                                                    |
| Morris [32]         | 1999        | “As a form of collective behavior, social movements were considered spontaneous, unorganized, and unstructured phenomena that were discontinuous with institutional and organizational behavior” (p.531).                             |
| Parkinson [33]      | 2000        | A group of people organized, outside of institutions established for this purpose, to bring about political and social change which will satisfy their shared interest or goal.                                                       |
| Bibby [17]          | 2009        | “A voluntary collective of individuals committed to promoting or resisting change through coordinated activity. They produce a lasting and self-generating effect and create, as they do this, a sense of shared identity.” (p.25)    |
| Herechuk [34]       | 2010        | “A manifestation of people’s passions for a common cause. Social movement’s theory...sheds light on the passionate engagement that people bring to a common cause.” (p.148)                                                           |



|                   |      |                                                                                                                                                                                                                                                                                                                                                                                                                                                                                   |
|-------------------|------|-----------------------------------------------------------------------------------------------------------------------------------------------------------------------------------------------------------------------------------------------------------------------------------------------------------------------------------------------------------------------------------------------------------------------------------------------------------------------------------|
| Bell [35]         | 2014 | A large number of people who act together to pursue some shared objective.                                                                                                                                                                                                                                                                                                                                                                                                        |
| del Castillo [36] | 2016 | “A health social movement is a persevering people-powered effort to promote or resist change in the experience of health or the systems that shape it.” (p.23) “...social movements are innovators, forms of democratized engagement, community and resource mobilizers, knowledge producers, awareness raisers and conversations starters, empowerment builders, change accelerators, power redistributors, relationship builders, and diffusers of new ideologies.” (p.23 – 24) |
| Tremblay [37]     | 2018 | Large group actions that promote social change that seek to reverse unequal relations of power by creating broad social, political, or systemic changes.                                                                                                                                                                                                                                                                                                                          |

**Supplementary File 5. Table: Eligibility criteria**

| <b>Inclusion criteria</b>                                                                                                                                                                                                                                                                                                                                           | <b>Exclusion criteria</b>                                                                                                                                                                                                                                                                                       |
|---------------------------------------------------------------------------------------------------------------------------------------------------------------------------------------------------------------------------------------------------------------------------------------------------------------------------------------------------------------------|-----------------------------------------------------------------------------------------------------------------------------------------------------------------------------------------------------------------------------------------------------------------------------------------------------------------|
| <p>Articles were included if they:</p> <ul style="list-style-type: none"><li>• were peer-reviewed empirical, theoretical and descriptive literature;</li><li>• were grey literature limited to targeted grey literature databases and websites; and/or</li><li>• investigated social movements for knowledge uptake and/or sustainability in any setting.</li></ul> | <p>Articles were excluded if they:</p> <ul style="list-style-type: none"><li>• did not investigate social movement and/or not related to knowledge uptake and/or sustainability;</li><li>• were reported in languages other than English; and/or</li><li>• were commentaries, debates, or editorials.</li></ul> |

**Supplementary File 6. Figure: PRISMA Diagram for Concept Analysis**

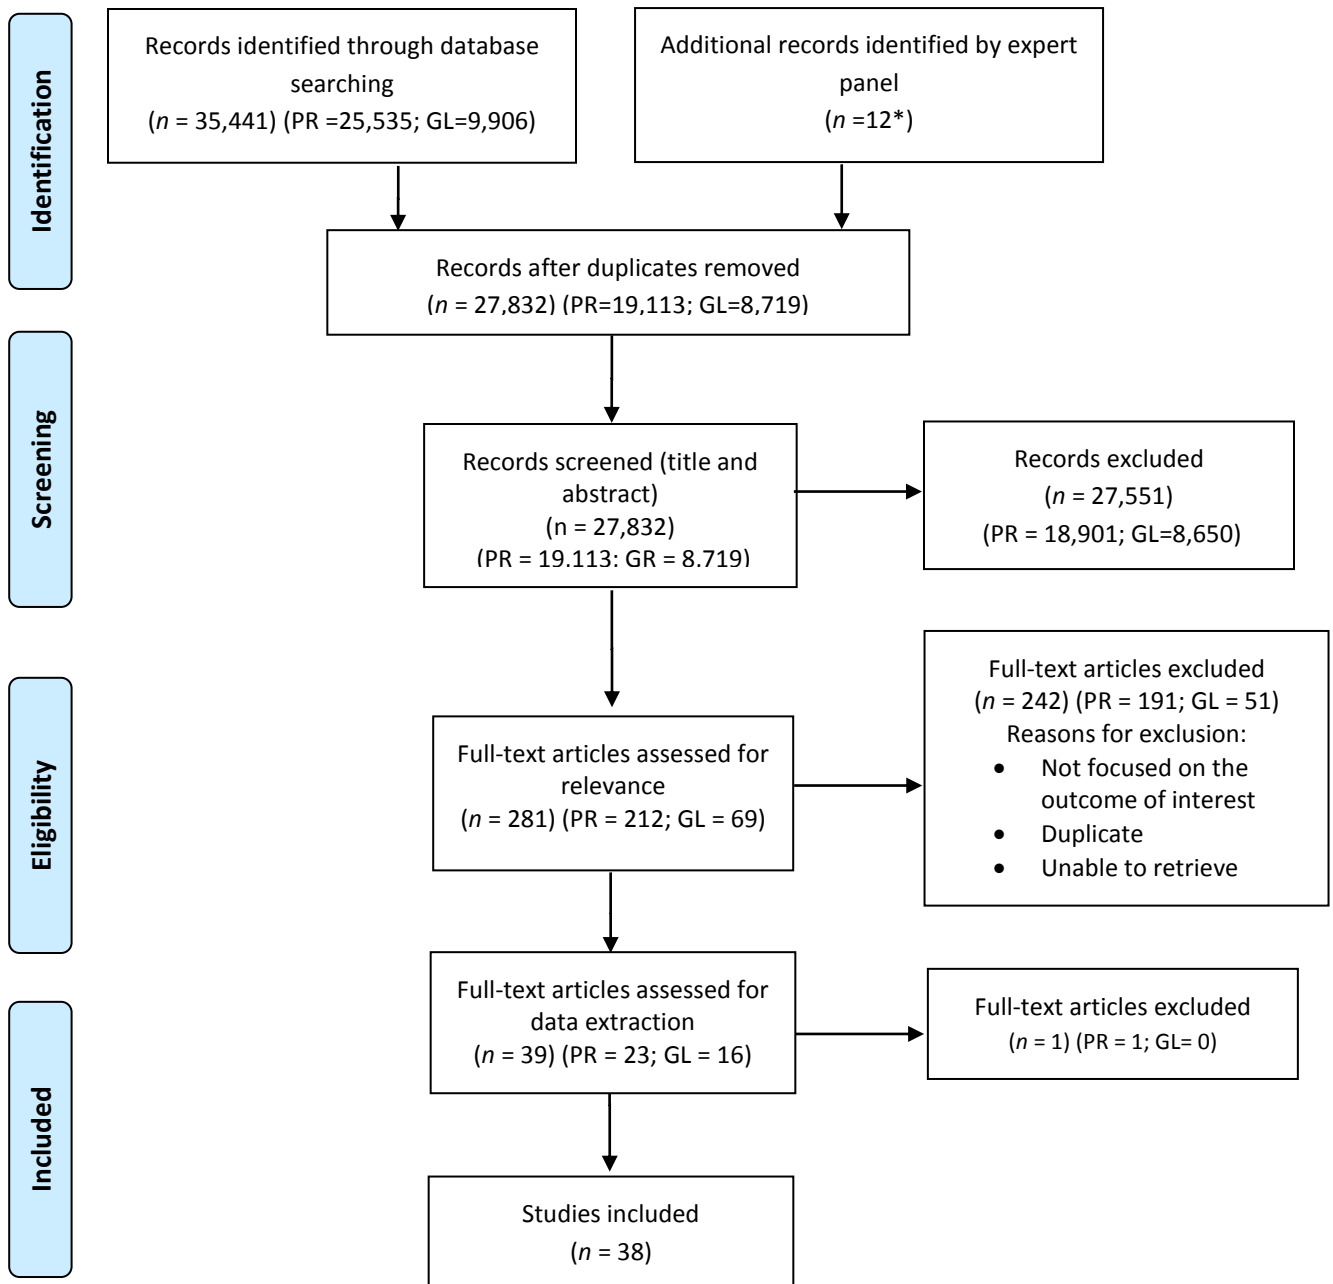

PR = Peer-reviewed. GL=Grey literature. \*All panel submissions are Grey literature

Flow diagram adapted from: Moher D, Liberati A, Tetzlaff J, et al. Preferred reporting items for systematic reviews and meta-analyses: the PRISMA statement. *BMJ*. 2009;339:b2535. doi: 10.1136/bmj.b
